# Supplementary material for: Optical properties of ferroic Fe2O(SeO3)2 and Fe2(SeO3)3·3H2O
Source: Royal Society of Chemistry journal article supplement (doi:10.1039/d3cp04531e), 2023-12-22
Supplement: d3cp04531e1.pdf [file d3cp04531e1.pdf]

## Supplementary Materials

### Tables

Table S1. Cell parameters of FSO and FSOH obtained by XRD refinement.

| Samples | <i>a</i> | <i>b</i> | <i>c</i> | <i>V</i> (Å <sup>3</sup> ) |
|---------|----------|----------|----------|----------------------------|
| FSO     | 6.4222   | 12.6161  | 13.1916  | 1068.8229                  |
| FSOH    | 9.3457   | 9.3457   | 20.2222  | 1529.6171                  |

Table S2. The Raman tensors *R* for Raman-active modes in FSOH.

|          |                                                                                                                                                        |
|----------|--------------------------------------------------------------------------------------------------------------------------------------------------------|
| <i>R</i> | $R(A_1) = \begin{pmatrix} a & 0 & 0 \\ 0 & a & 0 \\ 0 & 0 & b \end{pmatrix}; R(E) = \begin{pmatrix} 0 & c & d \\ c & 0 & 0 \\ d & 0 & 0 \end{pmatrix}$ |
|----------|--------------------------------------------------------------------------------------------------------------------------------------------------------|

Table S3. The Raman intensity of *A*<sub>1</sub> and *E* modes in FSOH under different configurations.

|                       |         |                                                       |
|-----------------------|---------|-------------------------------------------------------|
| <i>A</i>              | // (XX) | $I \propto (a \cos^2 \theta + b \sin^2 \theta)^2$     |
|                       | ⊥ (XY)  | $I \propto \left(\frac{b-a}{2} \sin 2\theta\right)^2$ |
| <i>E</i> <sub>1</sub> | // (XX) | $I \propto (d \sin 2\theta)^2$                        |
|                       | ⊥ (XY)  | $I \propto (d \cos 2\theta)^2$                        |

Table S4. The complex Raman tensor element with the imaginary part in FSOH.

$$R(A_1) = \begin{pmatrix} |a|e^{i\varphi_a} & 0 & 0 \\ 0 & |a|e^{i\varphi_a} & 0 \\ 0 & 0 & |b|e^{i\varphi_b} \end{pmatrix};$$

$$R(E) = \begin{pmatrix} 0 & |c|e^{i\varphi_c} & |d|e^{i\varphi_d} \\ |c|e^{i\varphi_c} & 0 & 0 \\ |d|e^{i\varphi_d} & 0 & 0 \end{pmatrix}$$

Table S5. The Raman intensity of *A*<sub>1</sub> and *E* modes in FSOH under different configurations.

|         |                                                                                         |
|---------|-----------------------------------------------------------------------------------------|
| // (XX) | $I \propto a^2 \cos^4 \theta + b^2 \sin^4 \theta + \frac{1}{2} a  b \cos(\varphi_{a-})$ |
|---------|-----------------------------------------------------------------------------------------|

|   |              |                                                                                   |
|---|--------------|-----------------------------------------------------------------------------------|
|   | $\perp$ (XY) | $I \propto \frac{1}{4} \sin^2 2\theta [a^2 + b^2 - 2 a  b \cos(\varphi_{a-b})]^2$ |
| E | // (XX)      | $I \propto ( d \sin 2\theta)^2$                                                   |
|   | $\perp$ (XY) | $I \propto ( d \cos 2\theta)^2$                                                   |

Table S6. The complex Raman tensor element with the imaginary part in FSO.

$$R(A_g) = \begin{pmatrix} |a|e^{i\phi_a} & 0 & 0 \\ 0 & |b|e^{i\phi_b} & 0 \\ 0 & 0 & |c|e^{i\phi_c} \end{pmatrix};$$

$$R(B_{2g}) = \begin{pmatrix} 0 & 0 & |e|e^{i\phi_e} \\ 0 & 0 & 0 \\ |e|e^{i\phi_e} & 0 & 0 \end{pmatrix}$$

Table S7. The Raman intensity of  $A_g$  and  $B_{2g}$  modes in FSO.

|          |              |                                                                                          |
|----------|--------------|------------------------------------------------------------------------------------------|
| $A_g$    | // (XX)      | $I \propto a^2 \cos^4 \theta + c^2 \sin^4 \theta + \frac{1}{2} a  c \cos(\varphi_{a-c})$ |
|          | $\perp$ (XY) | $I \propto \frac{1}{4} \sin^2 2\theta [a^2 + c^2 - 2 a  c \cos(\varphi_{a-b})]^2$        |
| $B_{2g}$ | // (XX)      | $I \propto (e \sin 2\theta)^2$                                                           |
|          | $\perp$ (XY) | $I \propto (e \cos 2\theta)^2$                                                           |

## Figures

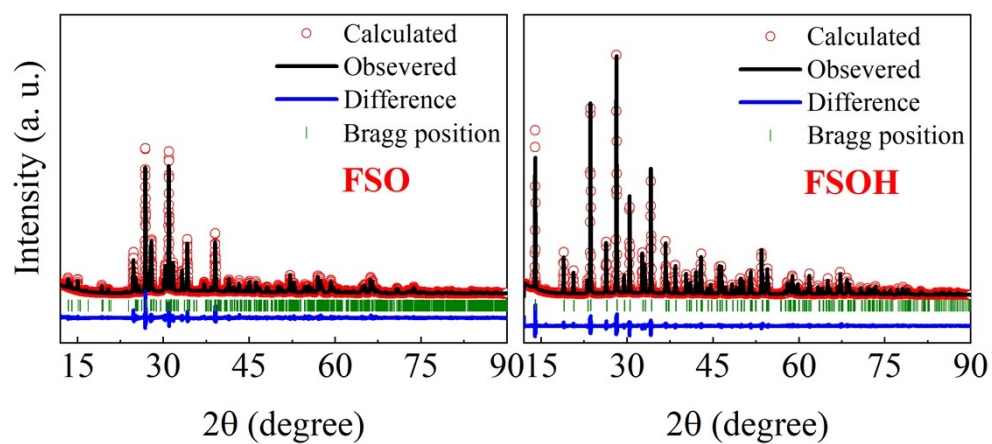

Fig. S1 Refined XRD mapping results of FSO and FSOH.

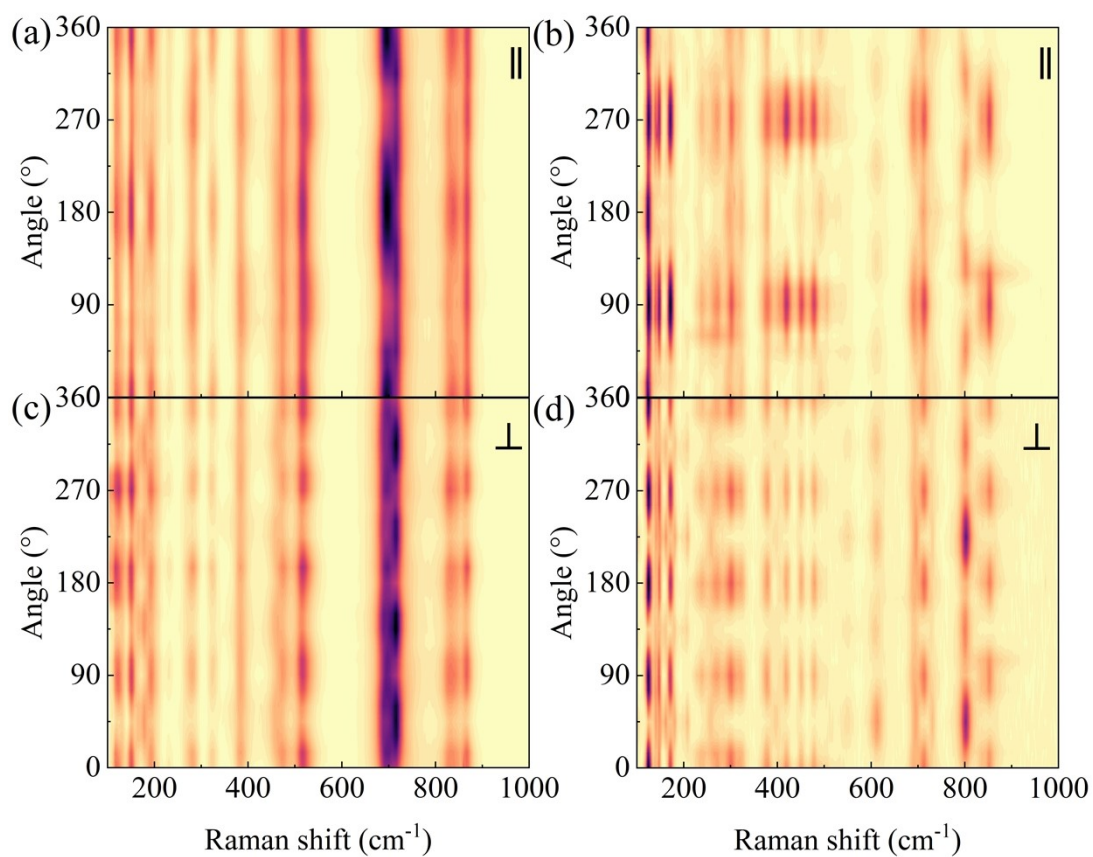

Fig. S2 The Raman intensity contour plots of FSOH (a, c) and FSO (b, d) under parallel and cross configurations.

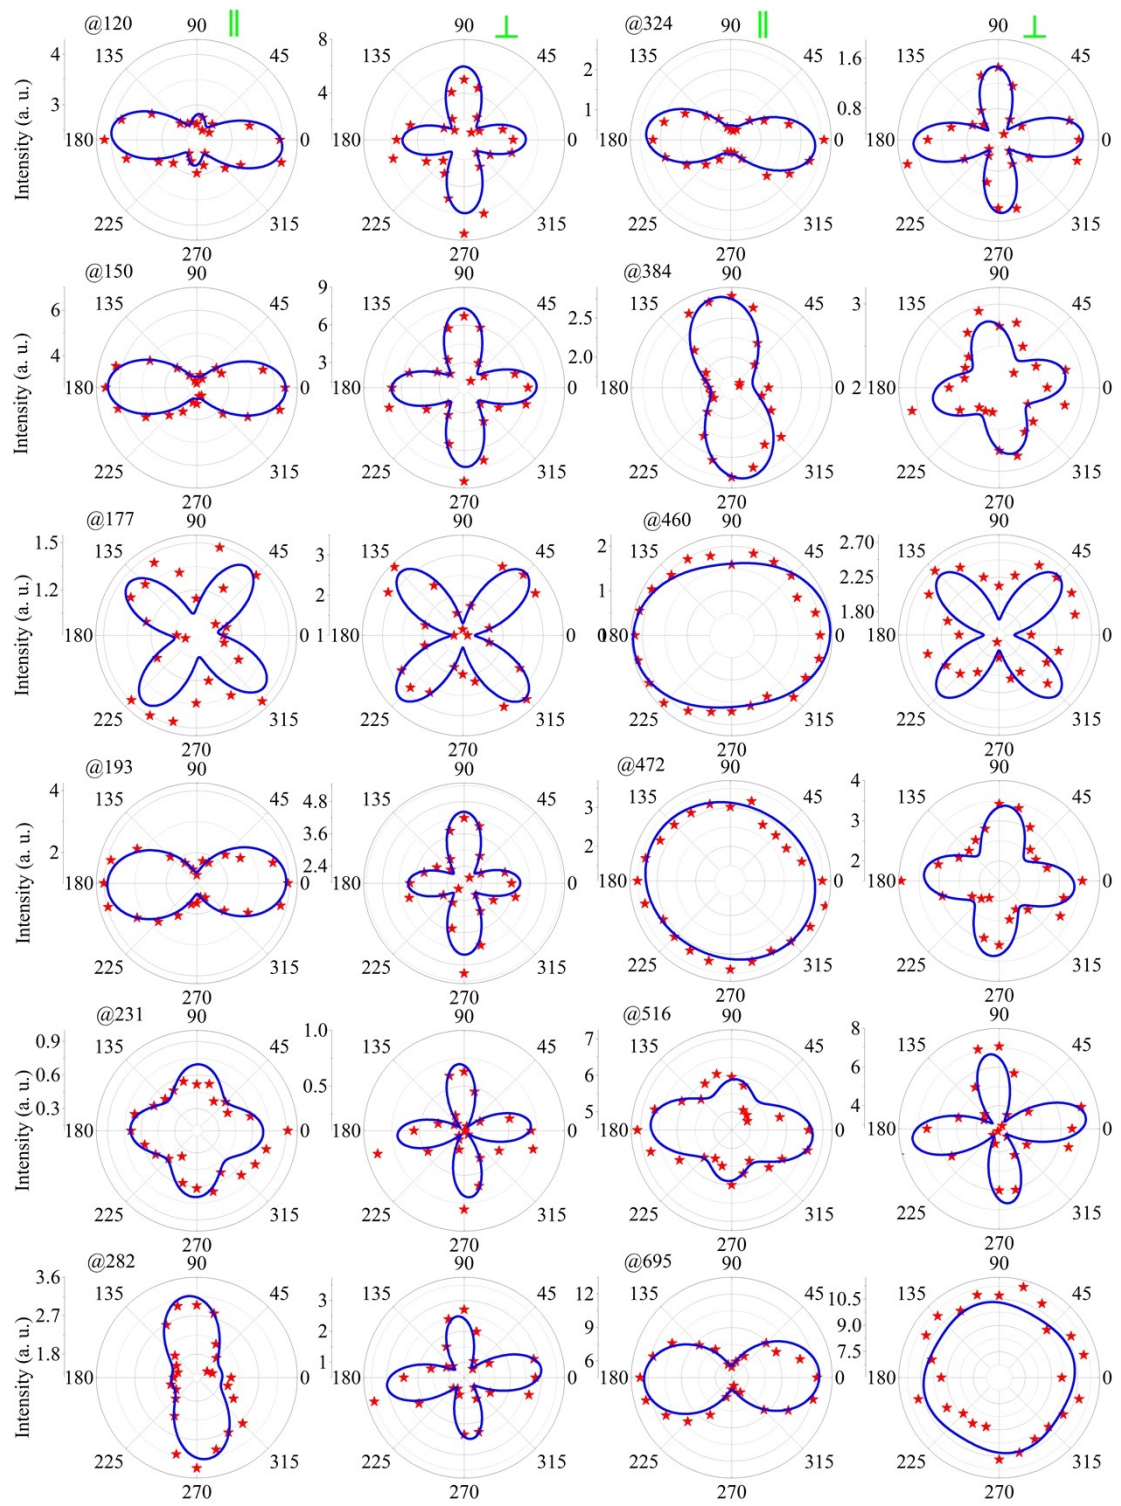

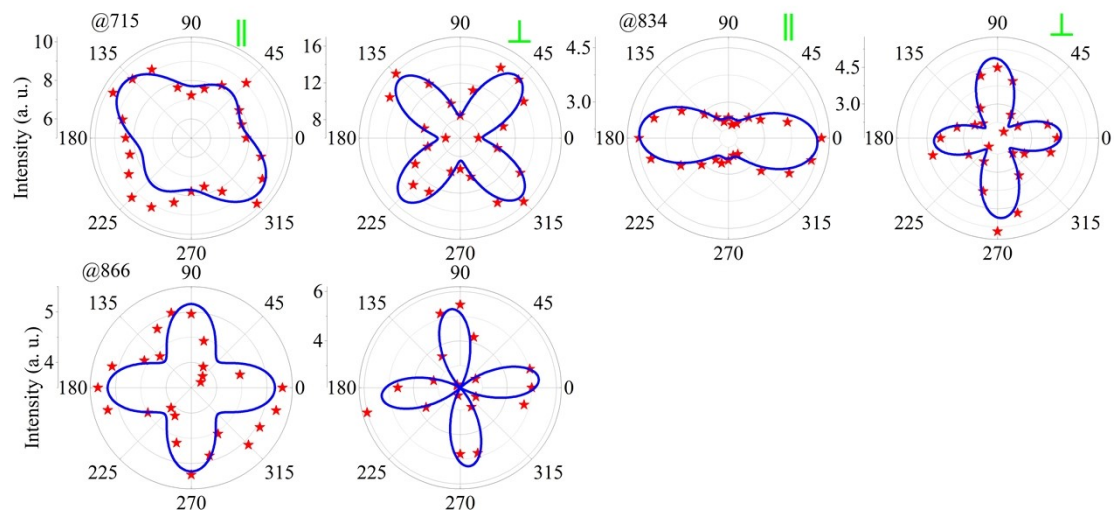

Fig. S3 Polar plot of the ARPRS results of FSOH under parallel and cross configurations.

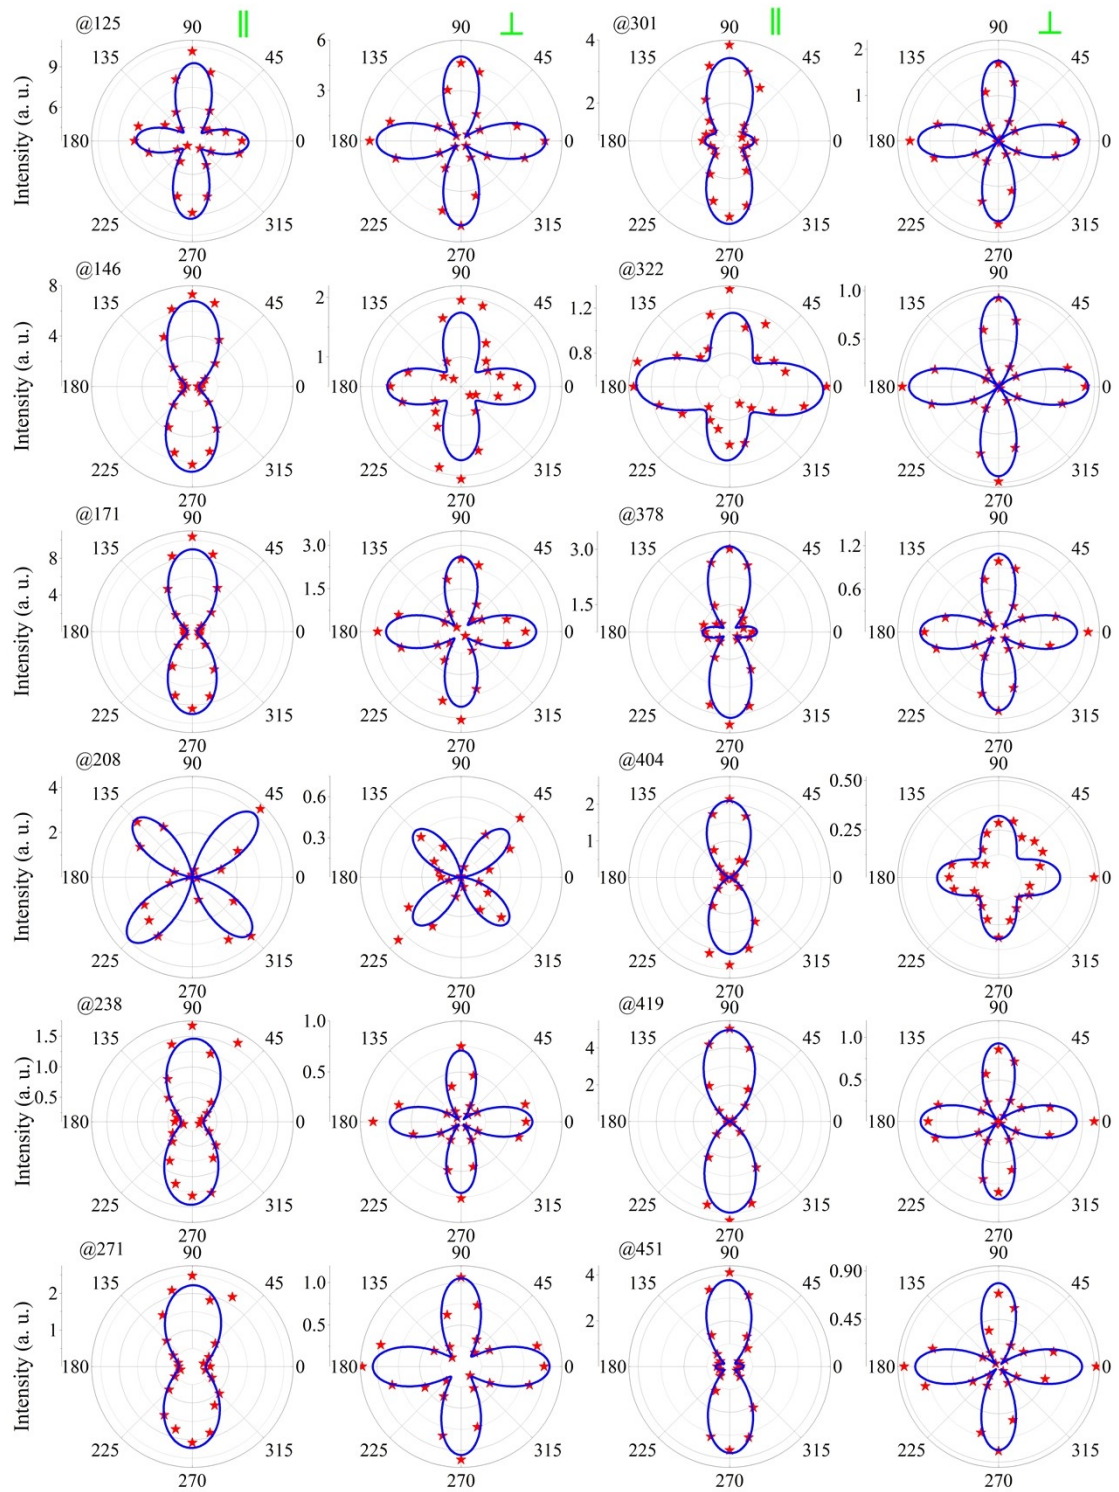

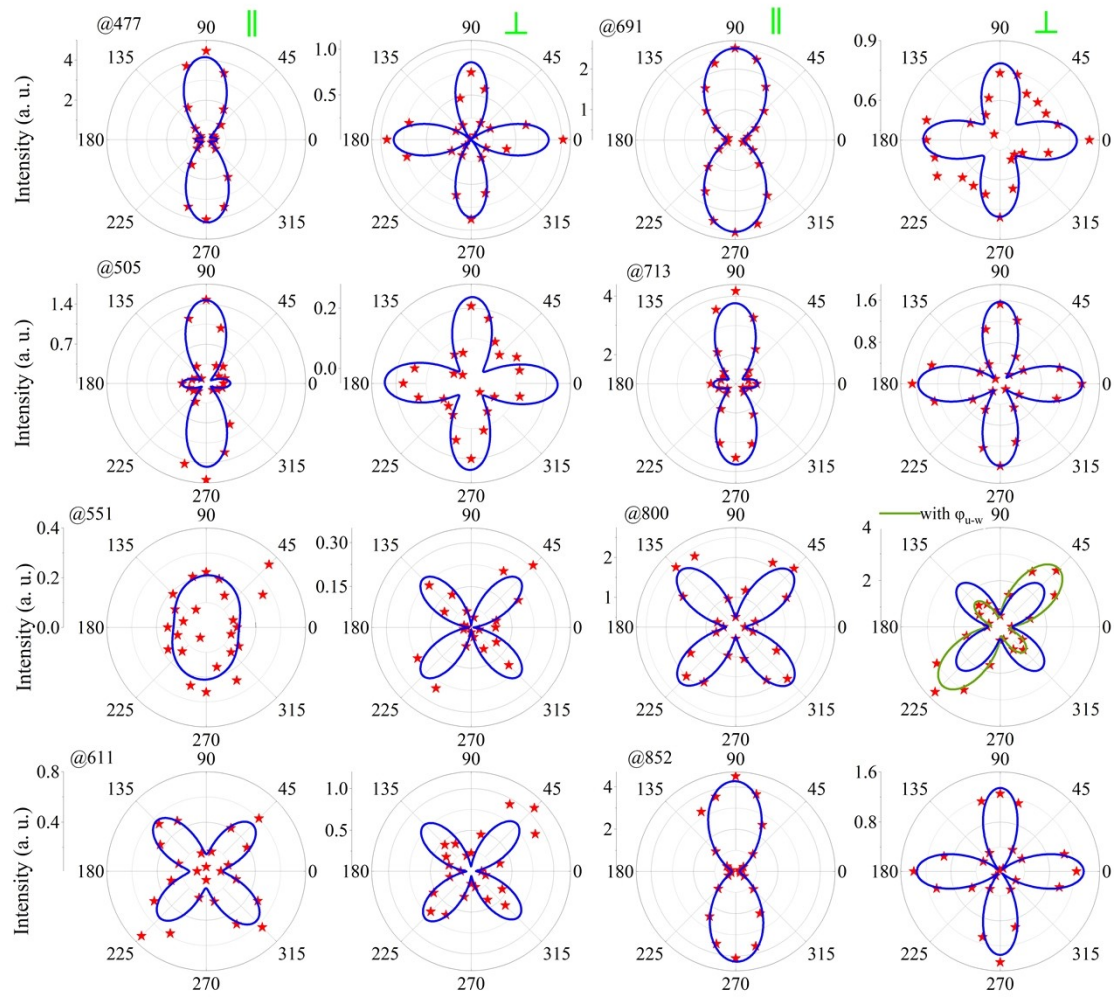

Fig. S4 Polar plots of the ARPRS results of FSO under parallel and cross configurations.
